# Supplementary material for: Genetic dissection of Escherichia coli's master diguanylate cyclase DgcE: Role of the N-terminal MASE1 domain and direct signal input from a GTPase partner system
Source: PubMed Central journal article supplement (PMC6510439; doi:10.1371/journal.pgen.1008059), 2019-04-25
Supplement: pgen.1008059.s009.pdf [file pgen.1008059.s009.pdf]

## S1 Table

### Oligonucleotide primers used in the present study<sup>1</sup>.

#### I. Primers used for generating chromosomal knockout mutations by one-step inactivation (OSI):

|                          |                                                                                              |
|--------------------------|----------------------------------------------------------------------------------------------|
| <i>glpG</i> -d-H1P1      | 5'-GCGTAACGCTTTATACTGTCCCCTTTTGTGTGGAATAAGCGACAGCAAC<br><b>GGTGTAGGCTGGAGCTGCTTC</b> -3'     |
| <i>glpG</i> -u-H2P4      | 5'-TTATAAATCCCTGGAATTATTTTCGTTTTTCGCGCATTGAGCGAATCAACA<br><b>ATTCCGGGGATCCGTCGACC</b> -3'    |
| <i>hflC</i> -d-H1P1      | 5'-CGACTACCAGCGTCAGGGGGAATAACGATGCGTAAGTCAGTTATCGCG<br><b>ATTATCGTGTAGGCTGGAGCTGCTTC</b> -3' |
| <i>hflC</i> -u-H2P4      | 5'-GACATCCCTGAGGATGCGGTGGCTTTATTGACCTGTACCGCAGTCGTTA<br><b>TAATTCCGGGGATCCGTCGACC</b> -3'    |
| <i>hflK</i> -d-H1P1      | 5'-GGCGTCGAAAGACAACAGGGATCACCGCATAACAAATATGGAGCACAA<br><b>ACGTGTAGGCTGGAGCTGCTTC</b> -3'     |
| <i>hflK</i> -u-H2P4      | 5'-CTGGTGGACGACGTGTTGCTTGCTCCACTGGTTGTGGAGGAAGAGGCTG<br><b>GATTCCGGGGATCCGTCGACC</b> -3'     |
| <i>hslVU</i> -H1P1       | 5'-GCTCGTGACAACACTATAGTAAGCGTACGCCGTGTGTAGGCTGGAGCTG<br><b>CTTC</b> -3'                      |
| <i>hslVU</i> -H2P2       | 5'-CGCGATTATAGGATAAAACGGCTCAGATCTCATATGAATATCCTCCTT<br><b>AG</b> -3'                         |
| <i>htpX</i> -d-H1P1      | 5'-GATGTGGGTATCGCATATTGCGTTTTGTTAAACTGAGGTAAAAAGAAAA<br><b>TTGTGTAGGCTGGAGCTGCTTC</b> -3'    |
| <i>htpX</i> -u-H2P4      | 5'-CATAAAAAAAGCGCGTCGATCAGGACGCGCTTTTTAGTATTTACTTCAT<br><b>AATTCCGGGGATCCGTCGACC</b> -3'     |
| <i>qmcA</i> -d-H1P1      | 5'-TCAAGCAGCAATTTTGCTGATTATGGACGGTACAACAGGAGGTTTTTCC<br><b>GGTGTAGGCTGGAGCTGCTTC</b> -3'     |
| <i>qmcA</i> -u-H2P4      | 5'-GTGGATGAACGACCATTAACCCATCATGGCTGAGTCCGTTTGTGGCG<br><b>CATTCCGGGGATCCGTCGACC</b> -3'       |
| <i>rdcA</i> -d-H1P1      | 5'-CTGGCTAAATAAAATAACAAAATTTGCTTTAAGGAAGAATTTTCGTGTA<br><b>GGCTGGAGCTGCTT</b> -3'            |
| <i>rdcA</i> -u-H2P2      | 5'-CCGACTCCAGCAGCGACCGGGGCCGTCAAGTAACGTCTTGGTCAAATG<br><b>AATATCCTCCTTAG</b> -3'             |
| <i>rdcB</i> -d-H1P1      | 5'-GCGATGATATTCAAACACTTTTCACGGCAGAACGATATTGACCAAGGTG<br><b>TAGGCTGGAGCTGCTTC</b> -3'         |
| <i>rdcB</i> -u-H2P4      | 5'-CACACATGGATTCGTTTTAGGACTCATTGATGTAAGTATTATATCCG<br><b>GGATCCGTCGACC</b> -3'               |
| <i>rdcA-rdcB</i> -d-H1P1 | 5'-GGCTAAATAAAATAACAAAATTTGCTTTAAGGAAGAATTTCTATGTAC<br><b>GTGTAGGCTGGAGCTGCTTC</b> -3'       |
| <i>rdcA-rdcB</i> -u-H2P4 | 5'-GAACGATAAAACAGCGCCAGGCAACGACCAGGCGTTATACGCCCAA<br><b>TTCCGGGGATCCGTCGACC</b> -3'          |
| <i>ycbZ</i> -d-H1P1      | 5'-CCGGTTACGGTATAATCGCGGCTTTGACAACAGACTAAAAACATCAAC<br><b>TGTGTAGGCTGGAGCTGCTTC</b> -3'      |
| <i>ycbZ</i> -u-H2P4      | 5'-TTTATTGAAGCACGCAGGATAGCTAACACGTGTACGCTGAACAAGTCCG<br><b>AATTCCGGGGATCCGTCGACC</b> -3'     |

#### II. Primers & synthetic DNA fragments used for chromosomal deletions of single domains and point mutations by two-step mutagenesis:

|                               |                                      |                                                                                                 |
|-------------------------------|--------------------------------------|-------------------------------------------------------------------------------------------------|
| (step 1)<br><i>dgcE::ccdB</i> | <i>dgcE</i> (-52)-d-H1P1<br>(pKD45)  | 5'-GCATAAACACAGAAACGAATACTGGCGACCAG<br>GTCTTGGCGATAAAGCGGTACGCATCGTGGCCG<br><b>GATCTTGC</b> -3' |
|                               | <i>dgcE</i> (3376)-u-H2P2<br>(pKD45) | 5'-CGATTTGTAGGCATGATAAGACGCGTTAGCGT<br>CGCATCAGGCGATGGGGAAGCGGATAACAGAAA                        |

<sup>1</sup> Relevant nucleotides (e.g. restriction sites, mutations introduced or pKD4, pKD13, pKD45 and pSUB11-specific sequences) labeled in **bold**. All primer sequences are given from 5'- to 3'-end.

|                                                                                              |                                              |                                                                                                                                                                                                                                                                                                                                                                    |
|----------------------------------------------------------------------------------------------|----------------------------------------------|--------------------------------------------------------------------------------------------------------------------------------------------------------------------------------------------------------------------------------------------------------------------------------------------------------------------------------------------------------------------|
|                                                                                              |                                              | <b>GGCCGGG-3'</b>                                                                                                                                                                                                                                                                                                                                                  |
| <b>(step 2)</b><br><i>dgcE</i> <sup>ΔEAL</sup>                                               | MP-d-ΔEAL                                    | 5'-CCTGGATGTTAGGAAGGGGGCG-3'                                                                                                                                                                                                                                                                                                                                       |
|                                                                                              | MP-u-ΔEAL                                    | 5'-GTAGGCATGATAAGACGCGTTAGCGTTCGCATC<br>AGGCGATGGGGAAGCACGCCTCACCGTTTCGCTAT<br>GTGCGGCAGCTTG-3'                                                                                                                                                                                                                                                                    |
| <b>(step 2)</b><br><i>dgcE</i> <sup>ΔPAS3</sup>                                              | A_ <i>dgcE</i> -d(-377)                      | 5'-GCCGGAAGCCGATGCGCCAG-3'                                                                                                                                                                                                                                                                                                                                         |
|                                                                                              | A_MP-u-ΔPAS3                                 | 5'-TTCGAAATGTGTTTGCCTTCCGCAC-3'                                                                                                                                                                                                                                                                                                                                    |
|                                                                                              | B_MP-d-ΔPAS3                                 | 5'-GTGCGGAACGCAAACACATTTCCGAAAGCGCC<br>TCCCATGATGCACTG-3'                                                                                                                                                                                                                                                                                                          |
|                                                                                              | B_ <i>dgcE</i> -u-3516                       | 5'-CGCCGTTATGCCGAGCGCTGG-3'                                                                                                                                                                                                                                                                                                                                        |
| <b>(step 1)</b><br><i>TM</i> <sup>DgcE</sup> :: <i>ccdB</i>                                  | <i>dgcE</i> (-52)-d-H1P1<br>(pKD45)          | 5'-GCATAAACACAGAAACGAATACTGGCGACCAG<br>GTCTTGCGGATAAAGCGGTACGCATCGTGGCCG<br><b>GATCTTGC-3'</b>                                                                                                                                                                                                                                                                     |
|                                                                                              | <i>TM</i> <sup>DgcEΔEAL</sup> :: <i>ccdB</i> | 5'-CGCCATACCGATAGCGGAATATTCCATCGCGT<br>TCCGAAAGTGGGTTTCGCTCGGATAACAGAAAG<br><b>GCCGGG-3'</b>                                                                                                                                                                                                                                                                       |
| <b>(step 2)</b><br><i>dgcE</i> <sup>ΔTM</sup>                                                | MP-d-ΔTM                                     | 5'-GCATAAACACAGAAACGAATACTGGCGACCAG<br>GTCTTGCGGATAAAGCGGTAATGGCGGAACGCAA<br>ACACATTTCCG-3'                                                                                                                                                                                                                                                                        |
|                                                                                              | <i>dgcE</i> <sup>ΔTMΔEAL</sup>               | MP-u-ΔTM                                                                                                                                                                                                                                                                                                                                                           |
| <b>(step 2)</b><br>( <i>TM1+2</i> ) <sup>LacY</sup> ::<br><i>dgcE</i> <sup>ΔTM/ΔTMΔEAL</sup> |                                              | 5'-GCATAAACACAGAAACGAATACTGGCGACCAGGTCTTGCGGATAAAGC<br>GGTAATGTACTATTTAAAAACACAACTTTTGGATGTTTCGGTTTATTCTTT<br>TTCTTTTACTTTTTATCATGGGAGCCTACTTCCCCTTTTCCCGATTTGGCT<br>ACATGACATCAACCATATCAGCAAAAGTGATACGGGTATTATTTTTGCCG<br>TATTTCTCTGTTCTCGCTATTATTTCCAACCGCTGTTTGGTCTGCTTTCTGCGG<br>AACGCAAACACATTTCCGAAAGCGAAACCCACTTTCGGAACGCGATGGAA<br>TATTCGCTATCGGTATGGCG-3' |
| <b>(step 1)</b><br><i>GGDEF</i> <sup>DgcE</sup> :: <i>ccdB</i>                               | <i>dgcE</i> (2134)-d-H1P1<br>(pKD45)         | 5'-CAGTTTTGAGAAACAACACTGCGTATCCTGCTGC<br>AAACGGTAAACAGTACACATCCGCATCGTGGCC<br><b>GGATCTTGC-3'</b>                                                                                                                                                                                                                                                                  |
|                                                                                              | <i>dgcE</i> (2536)-u-H2P2<br>(pKD45)         | 5'-CTGTTTCATCAAGCGACATCGCCGCCCGTTCGCT<br>ATGTGCGGCAGCTTGCTGCGGATAACAGAAAGG<br><b>CCGGG-3'</b>                                                                                                                                                                                                                                                                      |
| <b>(step 2)</b><br><i>dgcE</i> <sup>GGAAF</sup>                                              | A_ <i>dgcE</i> -d-1665                       | 5'-GCGCCTGCACATTACGCTTG-3'                                                                                                                                                                                                                                                                                                                                         |
|                                                                                              | A_MP-u-GGAAF                                 | 5'-CAGACCAAATGCAGCCCCACCGAGTC-3'                                                                                                                                                                                                                                                                                                                                   |
|                                                                                              | B_MP-d-GGAAF                                 | 5'-GACTCGGTGGGGCTGCATTTGGTCTG-3'                                                                                                                                                                                                                                                                                                                                   |
|                                                                                              | B_ <i>dgcE</i> -u-2275                       | 5'-CCGGCGGTCAAGAGCATGGC-3'                                                                                                                                                                                                                                                                                                                                         |
| <b>(step 1)</b><br><i>rdcA</i> (bp7-<br>1005):: <i>ccdB</i>                                  | <i>rdcA</i> (-43)-d-H1P1<br>(pKD45)          | 5'-GGCTAAATAAAAATAACAAAATTTGCTTTAAGG<br>AAGAATTTTCTATGTACCGCATCGTGGCCGGAT<br><b>CTTGC-3'</b>                                                                                                                                                                                                                                                                       |
|                                                                                              | <i>rdcA</i> -u-H2P2<br>(pKD45)               | 5'-CCGTTGTTGGCTAACTCATAGCGCGCCCGATTC<br>GCCAGGTAGCCCCACATCGGATAACAGAAAGGC<br><b>CGGG-3'</b>                                                                                                                                                                                                                                                                        |
| <b>(step 2)</b><br><i>rdcA</i> T103D                                                         | A_ <i>yjdA</i> -d(-70)                       | 5'-GCCGAAAACAGAACTCAAAAAC-3'                                                                                                                                                                                                                                                                                                                                       |
|                                                                                              | A_MP-u- <i>yjdA</i> T103D                    | 5'-GAATAAGCGTCGGCAGCGCTCCATTGGGCGA<br>TTACG-3'                                                                                                                                                                                                                                                                                                                     |
|                                                                                              | B_MP-d- <i>yjdA</i> T103D                    | 5'-CGTAATCGCCAATGGACGCGCTGCCGACGCT<br>TATTC-3'                                                                                                                                                                                                                                                                                                                     |
|                                                                                              | B_ <i>yjdA</i> -u-1108                       | 5'-CGGCATGGGCAAATCTTCC-3'                                                                                                                                                                                                                                                                                                                                          |

|                                     |                            |                                                                           |
|-------------------------------------|----------------------------|---------------------------------------------------------------------------|
| <b>(step 2)</b><br><i>rdcA</i> K82A | A_ <i>rdcA</i> -d(-41)     | 5'-CTAAATAAAATAACAAAATTTGCTTTAAGGA<br>AGAATTTTCTATGTACACACAGACCCTGTATG-3' |
|                                     | A_KpnI- <i>rdcA</i> -K82A  | 5'-GCAATTGTCGGTACCATGAAAGCAGGGCG<br>TCAACCACCATTAATGCCATTGTTGG-3'         |
|                                     | B_AatII- <i>rdcA</i> -K82A | 5'-GGCCCGGACGTCCAGCGCCTTCGC-3'                                            |
|                                     | B_ <i>yjdA</i> -u-1108     | 5'-CGGCATGGGCAAATCTTCC-3'                                                 |

### III. Primers used for chromosomal C-terminal 3xFLAG-tagging of *dgcE* variants and *rdcA*:

|                                           |                                                                                    |
|-------------------------------------------|------------------------------------------------------------------------------------|
| <i>dgcE</i> -d-H1P1<br>(FLAG)             | 5'-GCTGGATTTGCTGGTGAATAGTAGTTATTTTCGCGATTAACGACTACAAAG<br>ACCATGACGG-3'            |
| <i>dgcE</i> -u-H2P2<br>(FLAG)             | 5'-CGCGTTAGCGTCGCATCAGGCGATGGGGAAGCACGCCTCACCTTAGTTCC<br>TATCCGAAGTTC-3'           |
| <i>dgcE</i> $\Delta$ EAL-d-H1P1<br>(FLAG) | 5'-GCCGGGTGACGGTTTACGAACCGCAGCAAGCTGCCGCACATAGCGAACGG<br>GACTACAAAGACCATGACGG-3'   |
| <i>dgcE</i> $\Delta$ EAL-u-H2P2<br>(FLAG) | 5'-CGCGTTAGCGTCGCATCAGGCGATGGGGAAGCACGCCTCACCTTAGTTCC<br>TATCCGAAGTTC-3'           |
| <i>rdcA</i> -d-H1P1                       | 5'-CCCAGCTGTTACGCGATGATATTCAAACACTTTTCACGGCAGAACGATAT<br>GACTACAAAGACCATGACGG-3'   |
| <i>rdcA</i> -u-H2P2                       | 5'-GATAAACCGACTCCAGCACGCGACCGGGCCGTCAAGTAACGTCTTGGTC<br>ACCTTAGTTCCTATCCGAAGTTC-3' |

### IV. Primers used for cloning into pCAB18 (Barembuch et al. 2007):

|                                                             |                                                           |
|-------------------------------------------------------------|-----------------------------------------------------------|
| <i>dgcE</i> _EcoRI_f                                        | 5'-CGCGAATTCATGAGCAAACAATCACAGC-3'                        |
| <i>dgcE</i> 6His_HindIII_r                                  | 5'-GACAAGCTTTTCAGTGATGGTGATGGTGAATATCGCGAAATAACTAC-<br>3' |
| <i>dgcE</i> _HindIII_r                                      | 5'-GACAAGCTTTTCAGTTAATCGCGAAATAACTAC-3'                   |
| <i>dgcE</i> $\Delta$ EAL6His_<br>HindIII_r                  | 5'-GACAAGCTTTTCAGTGATGGTGATGGTGAATATCGCGAAATAACTAC-<br>3' |
| <i>dgcE</i> -<br>EAL6His_HindIII_r                          | 5'-GACAAGCTTTTCAGTGATGGTGATGGTGAATATCGCGAAATAACTAC-<br>3' |
| <i>dgcE</i> $\Delta$ TM_EcoRI_f                             | 5'-CGCGAATTCATGAGCAAAGCGGAACGCAAACACATTTCC-3'             |
| (TM1+2) <i>LacY</i> _on_d<br><i>gcE</i> $\Delta$ TM_EcoRI_f | 5'-CGCGAATTCATGAGCAAATACTATTTAAAAAACACAAAC-3'             |
| <i>rdcA</i> _EcoRI_f                                        | 5'-CGCGAATTCATGTACACACAGACCCTGTATG-3'                     |
| <i>rdcB</i> _HindIII_r                                      | 5'-GACAAGCTTTTACGCCAAATTTACAGAGAAG-3'                     |

### V. Primers used for constructing bacterial two-hybrid plasmids on the basis of the pKT25, pKNT25, pUT18C and pUT18 vectors (Karimova et al. 1998):

|                                                                      |                                    |                                                                 |
|----------------------------------------------------------------------|------------------------------------|-----------------------------------------------------------------|
| <i>dgcE</i><br><i>dgcE</i> $\Delta$ TM<br>EAL <sup><i>dgcE</i></sup> | <i>dgcE</i> _XbaI_f                | 5'-GCCTCTAGAGAGCAAACAATCACAGCATG-3'                             |
|                                                                      | <i>dgcE</i> $\Delta$ TM_XbaI_f     | 5'-GCCTCTAGAGCGTGCGGAACGCAAACACATTT<br>CCG-3'                   |
|                                                                      | <i>dgcE</i> -EAL_XbaI_f            | 5'-GCCTCTAGAGGCACATAGCGAACGGGCGGC-3'                            |
|                                                                      | <i>dgcE</i> _KpnI_r                | 5'-GCCGGTACCCGGTTAATCGCGAAATAACTAC-<br>3'                       |
| <i>dgcE</i> $\Delta$ EAL<br>TM <sup><i>dgcE</i></sup>                | <i>dgcE</i> _XbaI_f                | 5'-GCCTCTAGAGAGCAAACAATCACAGCATG-3'                             |
|                                                                      | <i>dgcE</i> $\Delta$ EAL_KpnI_r    | 5'-GCCGGTACCCGCCGTTTCGCTATGTGCGGCAGC<br>TTG-3'                  |
|                                                                      | <i>dgcE</i> -TM_KpnI_r             | 5'-GCCGGTACCCGTTTCGGAAATGTGTTTTCGTT-3'                          |
| <i>dgcE</i> $\Delta$ GGDEF                                           | A_ <i>dgcE</i> _XbaI_f             | 5'-GCCTCTAGAGAGCAAACAATCACAGCATG-3'                             |
|                                                                      | A_MP_ <i>dgcE</i> -u-2133_r        | 5'-ATGTGTAAGTGTGTTTACCGTTTGCAGCAGGATAC-<br>3'                   |
|                                                                      | B_MP_ <i>dgcE</i> $\Delta$ GGDEF_f | 5'-GTATCCTGCTGCAAACGGTAAACAGTACACAT<br>CAGCAAGCTGCCGCACATAGC-3' |

|                                                                           |                                    |                                            |
|---------------------------------------------------------------------------|------------------------------------|--------------------------------------------|
|                                                                           | B_ <i>dgcE</i> _KpnI_r             | 5'-GCCGGTACCCGGTTAATCGCGAAATAACTAC-3'      |
| <i>PAS3</i> <sup><i>dgcE</i></sup><br><i>GGDEF</i> <sup><i>dgcE</i></sup> | <i>dgcE</i> - <i>PAS3</i> _XbaI_f  | 5'-GCCTCTAGAGCACATTTCCGAAAGCGAAACC-3'      |
|                                                                           | <i>dgcE</i> - <i>GGDEF</i> _XbaI_f | 5'-GCCTCTAGAGAGTACACATCAGCGACATGCC-3'      |
|                                                                           | <i>dgcE</i> - <i>PAS3</i> _KpnI_r  | 5'-GCCGGTACCCGCAGTTGTTTCTCAAAACTGGC-3'     |
|                                                                           | <i>dgcE</i> - <i>GGDEF</i> _KpnI_r | 5'-GCCGGTACCCGAGCTTGCTGCGGTTTCGTAAAC-3'    |
| <i>rdcA</i>                                                               | <i>rdcA</i> _XbaI_f                | 5'-GCCTCTAGAGTACACACAGACCCTGTATGAG-3'      |
|                                                                           | <i>rdcA</i> _BamHI_r               | 5'-GCCGGATCCCGATATCGTTCTGCCGTGAAAA<br>G-3' |
| <i>rdcB</i>                                                               | <i>rdcB</i> _XbaI_f                | 5'-GCCTCTAGAGACCAAGACGTTACTTGACGGC-3'      |
|                                                                           | <i>rdcB</i> _KpnI_r                | 5'-GCCGGTACCCGCGCCAAATTTACAGAGAAGA-3'      |
